# Supplementary material for: The “Omega Sign”: a novel HoLEP technique that improves continence outcomes after enucleation
Source: Springer Nature journal article supplement (doi:10.1007/s00345-020-03152-9), 2020-03-19
Supplement: MOESM3 [file 17815294]

| Supplementary material 3: Intraoperative and postoperative complications | | | | |
| --- | --- | --- | --- | --- |
| Intraoperative complications | Group 1 | Group 2 | p | Evaluation |
| Deviations from the normal postoperative course (postoperative emesis, electrolyte imbalance, pain ect...) | 9 | 9 | 1 | Treated with antiemetics, antipyretics, analgesics, diuretics and electrolytes, and physiotherapy (G1) |
| Bleeding | 1 | 1 | 1 | Transfusion (G2) |
| Capsular perforation | 2 | 2 | 1 | Longer catheterization, 3 days (G1) |
| Superficial bladder mucosal injury | 4 | 2 | 0.42 | Longer catheterization, 3 days (G1) |
|  |  |  |  |  |
| Postoperative complications | Group 1 | Group 2 | p | Evaluation |
| UTI | 2 | 3 | 0.65 | Intravenous antibiotic (G2) |
| Clot evacuation using urethral catheter | 1 | 1 | 1 | Irrigation (G3a) |
| Clot evacuation with cystoscopy | 1 | 0 | 1 | Cystoscopic intervention (G3b) |
| Re-cathterization | 3 | 2 | 0.65 | 3 days with antiinflammatory drug (G3a) |
| Bladder neck contracture | 2 | 1 | 1 | Bladder neck laser incision (G3b) |
| Urethral stricture | 2 | 2 | 1 | Internal urethrotomy (G3b) |
| Meatal stenosis | 2 | 1 | 1 | Meatoplasty (G3b) |
