# Supplementary material for: The “Omega Sign”: a novel HoLEP technique that improves continence outcomes after enucleation
Source: Springer Nature journal article supplement (doi:10.1007/s00345-020-03152-9), 2020-03-19
Supplement: MOESM4 [file 17815294]

**Supplementary Material 4**

Accompanying videos can be found on YouTube (Clip1: Animation video https://www.youtube.com/watch?v=1HeHysvX4hM&list=PLblSG79cP997y-8Oqh59U2ZdIYCscfQOs&index=28&t=0s Clip2: Non-edited educational video https://www.youtube.com/watch?v=uCq9M_19eNY&feature=youtu.be) and also be accessed by scanning QR codes in below:


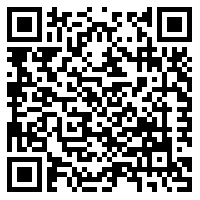
 **
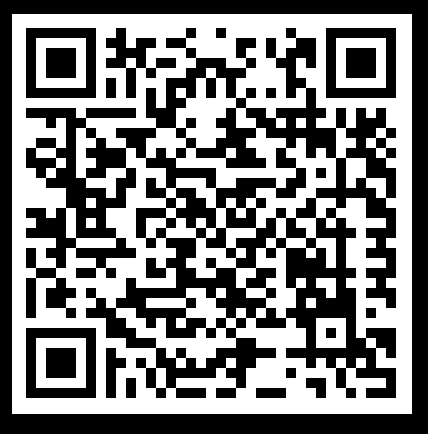
**
